# Supplementary material
Source: PubMed Central journal article supplement (PMC4731241)
Supplement: NIHMS738434-supplement-2.pdf [file NIHMS738434-supplement-2.pdf]

**Supplementary Table 1: Tuning property comparisons between this and previous studies<sup>(a)</sup>**

| Tuning property <sup>(b)</sup>                                | This study (calcium imaging of thalamic boutons or neurons in V1) | Previous studies (extracellular recording in dLGN or V1) |
|---------------------------------------------------------------|-------------------------------------------------------------------|----------------------------------------------------------|
| Percentage of visually responsive boutons/neurons that are OS | ~50%                                                              | 48%-63%, depending on definition <sup>(c)</sup>          |
| Tuning FWHM of OS thalamic boutons/neurons                    | 70-82°                                                            | 75.4 <sup>o(c)</sup>                                     |
| gOSI of OS thalamic boutons/neurons                           | 0.26                                                              | 0.19 <sup>(c)</sup>                                      |
| OSI of OS thalamic boutons/neurons                            | 0.56                                                              | 0.41 <sup>(c)</sup>                                      |
| Percentage of visually responsive L4 neurons that are OS      | 83%                                                               | 80% <sup>(d,e)</sup>                                     |
| Tuning FWHM of OS L4 neurons                                  | 33.6°                                                             | ~56 <sup>o(d)</sup>                                      |
| gOSI of OS L4 neurons                                         | Median=0.56, Mean=0.55                                            | Mean ~0.57 <sup>(d)</sup>                                |
| OSI of OS L4 neurons                                          | Median=0.78, Mean=0.74                                            | Mean ~0.86 <sup>(d)</sup>                                |
| Percentage of visually responsive L2/3 neurons that are OS    | 83%                                                               | 80% <sup>(d,e)</sup>                                     |
| Tuning FWHM of OS L2/3 neurons                                | 29.2°                                                             | ~44 – 56 <sup>o(d)</sup>                                 |
| gOSI of OS L2/3 neurons                                       | Median=0.58, Mean=0.57                                            | Mean ~0.56 <sup>(d)</sup>                                |
| OSI of OS L2/3 neurons                                        | Median=0.78, Mean=0.74                                            | Mean ~0.87 <sup>(d)</sup>                                |
| Percentage of visually responsive L5 neurons that are OS      | 63%                                                               | 74% <sup>(d,e)</sup>                                     |
| Tuning FWHM of OS L5 neurons                                  | 35.5°                                                             | ~74 <sup>o(d)</sup>                                      |
| gOSI of OS L5 neurons                                         | Median=0.46, Mean=0.47                                            | Mean ~0.35 <sup>(d)</sup>                                |
| OSI of OS L5 neurons                                          | Median=0.73, Mean=0.69                                            | Mean ~0.6 <sup>(d)</sup>                                 |

<sup>(a)</sup>Due to their large sample sizes, data from Zhao et al., 2015 (Reference 12) and Niell et al., 2008 (Reference 35) were chosen for comparison.

<sup>(b)</sup>Median values are used unless stated otherwise.

<sup>(c)</sup>Zhao et al., 2015

<sup>(d)</sup>Niell et al., 2008

<sup>(e)</sup>Calculated from Figure 9 of Niell et al., 2008 as (linear oriented + nonlinear oriented)/(1-nonresponsive).
